# Supplementary material for: Comparison of water desalination performance of porous graphene and MoS2 nanosheets
Source: Royal Society of Chemistry journal article supplement (doi:10.1039/d2ra04544c), 2022-01-01
Supplement: d2ra04544c1.pdf [file d2ra04544c1.pdf]

**Supporting Information to**

**Comparison of water desalination performance of porous graphene  
and MoS<sub>2</sub> nanosheets**

**By**

Zailing Song<sup>#a</sup>, Yunlong Niu<sup>#bc</sup>, Juan Yang<sup>a</sup>, Liang Chen<sup>a</sup>, Junlang, Chen<sup>\*a</sup>

*<sup>a</sup>Department of Optical Engineering, College of Optical, Mechanical and Electrical Engineering, Zhejiang A&F University, Lin'an 311300, China*

*<sup>b</sup>the State Key Laboratory of Industry Control Technology, College of Control Science and Engineering, Hangzhou 310027, China.*

*<sup>c</sup>Radiation Monitoring Technical Center of Ministry of Ecology and Environment, State Environmental Protection Key Laboratory of Radiation monitoring, Hangzhou 310012, China.*

# These authors contributed equally to this work.

\* Corresponding author Email: [chenjunlang7955@sina.com](mailto:chenjunlang7955@sina.com)

Table S1. The 12-6 Lennard-Jones parameters used in the simulations

| Interaction        | $\sigma[\text{\AA}]$                 | $\epsilon[\text{kcal mol}^{-1}]$ |
|--------------------|--------------------------------------|----------------------------------|
| S-S <sup>1</sup>   | 3.1300                               | 0.4612                           |
| Mo-Mo <sup>1</sup> | 4.2000                               | 0.0135                           |
| C-C <sup>2</sup>   | 3.3900                               | 0.0692                           |
| H-H <sup>2</sup>   | 0.0000                               | 0.0000                           |
| O-O <sup>2</sup>   | 3.1656                               | 0.1554                           |
| Na-Na <sup>3</sup> | 2.1600                               | 0.3526                           |
| Cl-Cl <sup>3</sup> | 4.8305                               | 0.0128                           |
| C-O <sup>4</sup>   | 3.4360                               | 0.0850                           |
| C-H <sup>4</sup>   | 2.6900                               | 0.0383                           |
| Rest               | Obtained by Lorentz-Berthelot rules. |                                  |

- 1 T. Liang, S. R. Phillpot and S. B. Sinnott, *Phys. Rev. B*, 2009, **79**, 245110.
- 2 A. Barati Farimani and N. R. Aluru, *J. Phys. Chem. B*, 2011, **115**, 12145–12149.
- 3 I. S. Joung and T. E. Cheatham, *J. Phys. Chem. B*, 2008, **112**, 9020–9041.
- 4 Y. Wu and N. R. Aluru, *J. Phys. Chem. B*, 2013, **117**, 8802–8813.

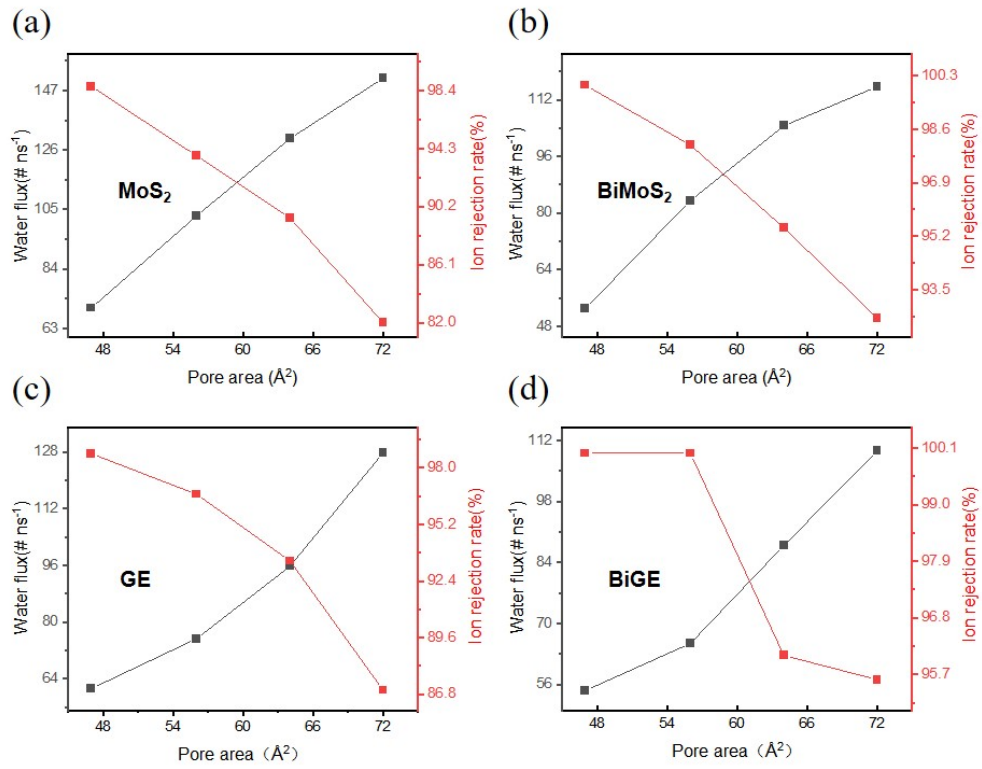

Figure S1. Water flux and ion rejection against pore size of the four membranes at 200 MPa. (a) MoS<sub>2</sub> monolayer, (b) MoS<sub>2</sub> bilayer, (c) GE monolayer, (d) GE bilayer.

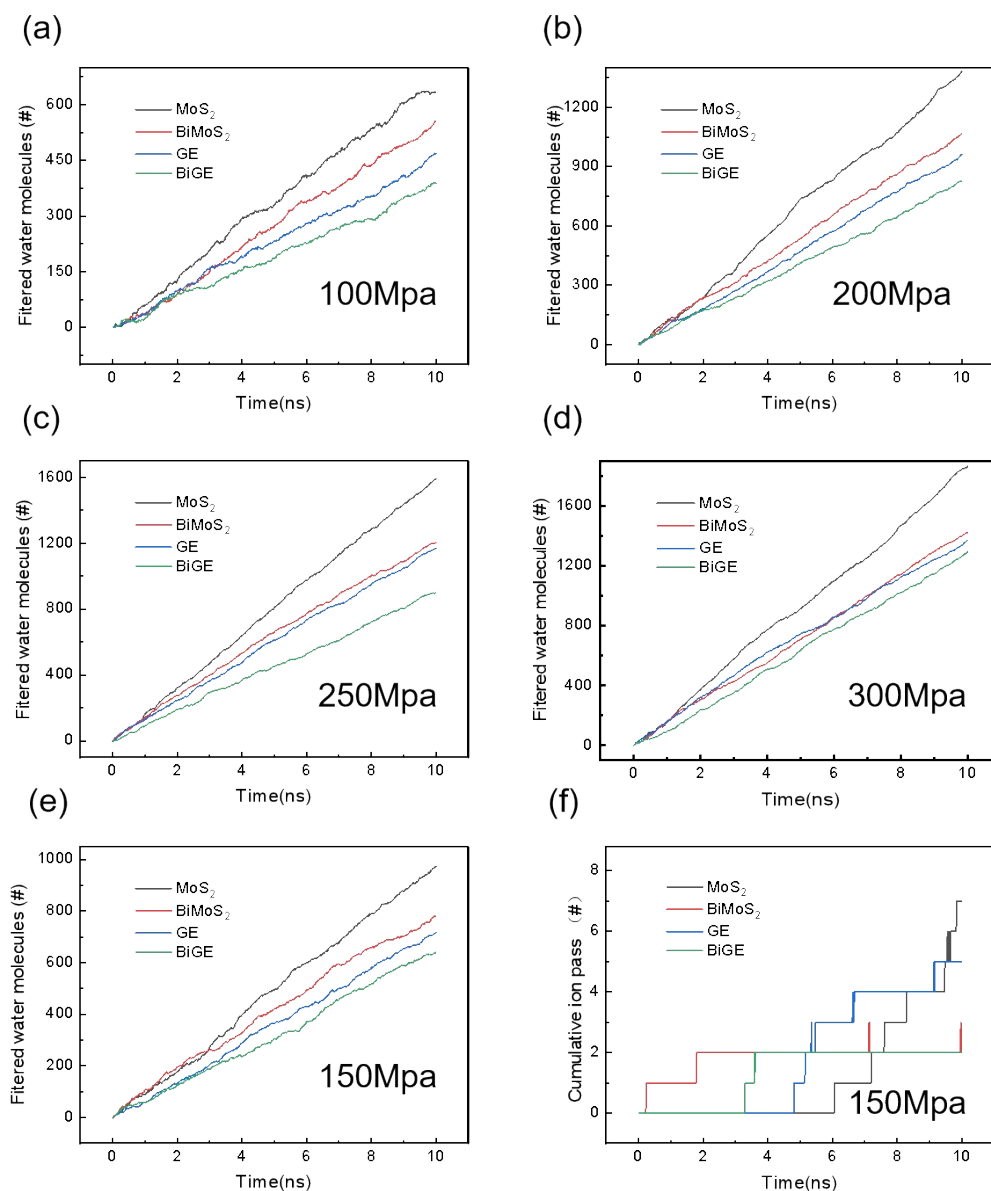

Figure S2. (a-d) The relationship between the number of filtered water molecules and the simulation time for membranes with different materials under different pressures. (e) Number of water molecules and (f) number of Na<sup>+</sup> pass through the nanopore as a function of simulation time for four nanopores at a fixed pressure (150 MPa) and a fixed pore area (64 Å<sup>2</sup>).

It can be seen from Figure S2 that the water flux of MoS<sub>2</sub> is much larger than that of GE regardless of monolayer and bilayer under each exerted pressure. As for monolayer membrane, MoS<sub>2</sub> performs 19.8%, 36.8%, 35.3% and 37.4% better than GE in terms of water permeation under external pressures of 100 MPa, 200 MPa, 250

MPa and 300 MPa, respectively. Similarly, BiMoS<sub>2</sub> membranes perform 29.9%, 19.1%, 16.5% and 18.4% better than BiGE membranes.
